# Supplementary material
Source: PubMed Central journal article supplement (PMC3668022)

**Supplemental Figure 1**  
**Board CNAs and Focal CNAs**

**C''**

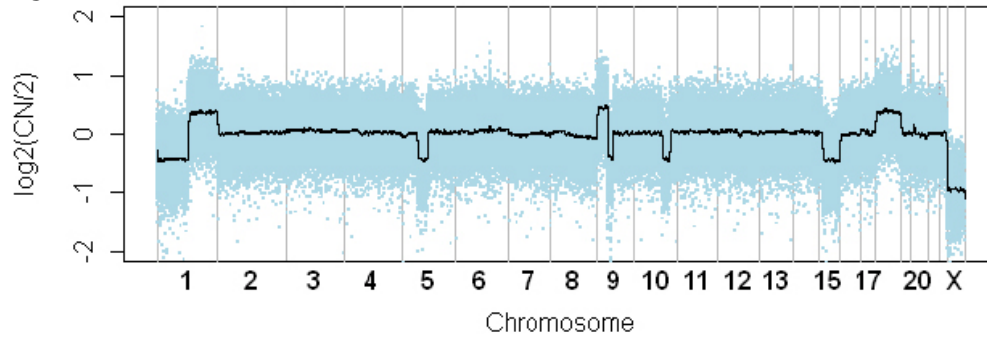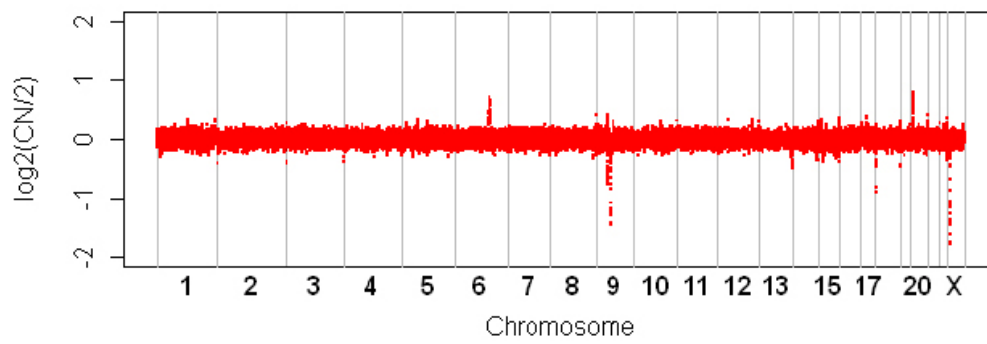

**CNN-LOH**

**D''**

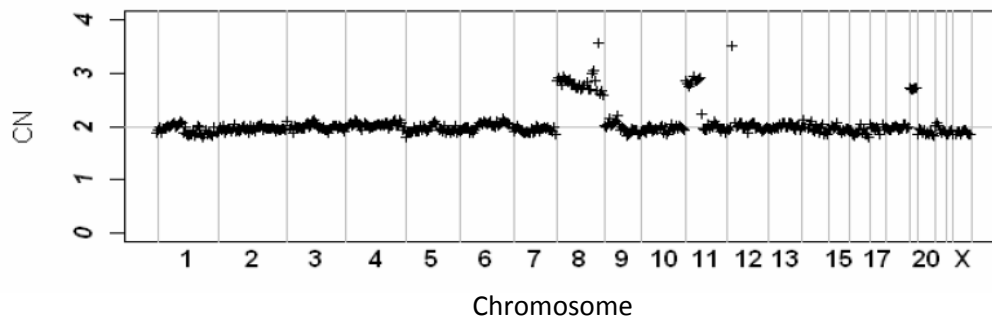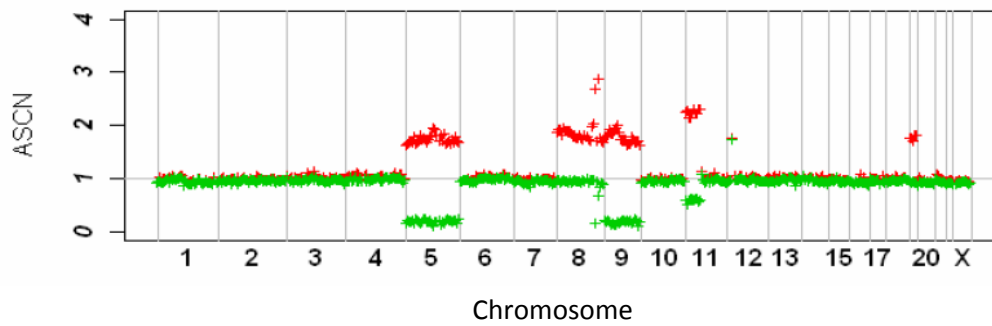

Supplement: mmc1.pdf [file mmc1.pdf]

Supplemental Figure 2.

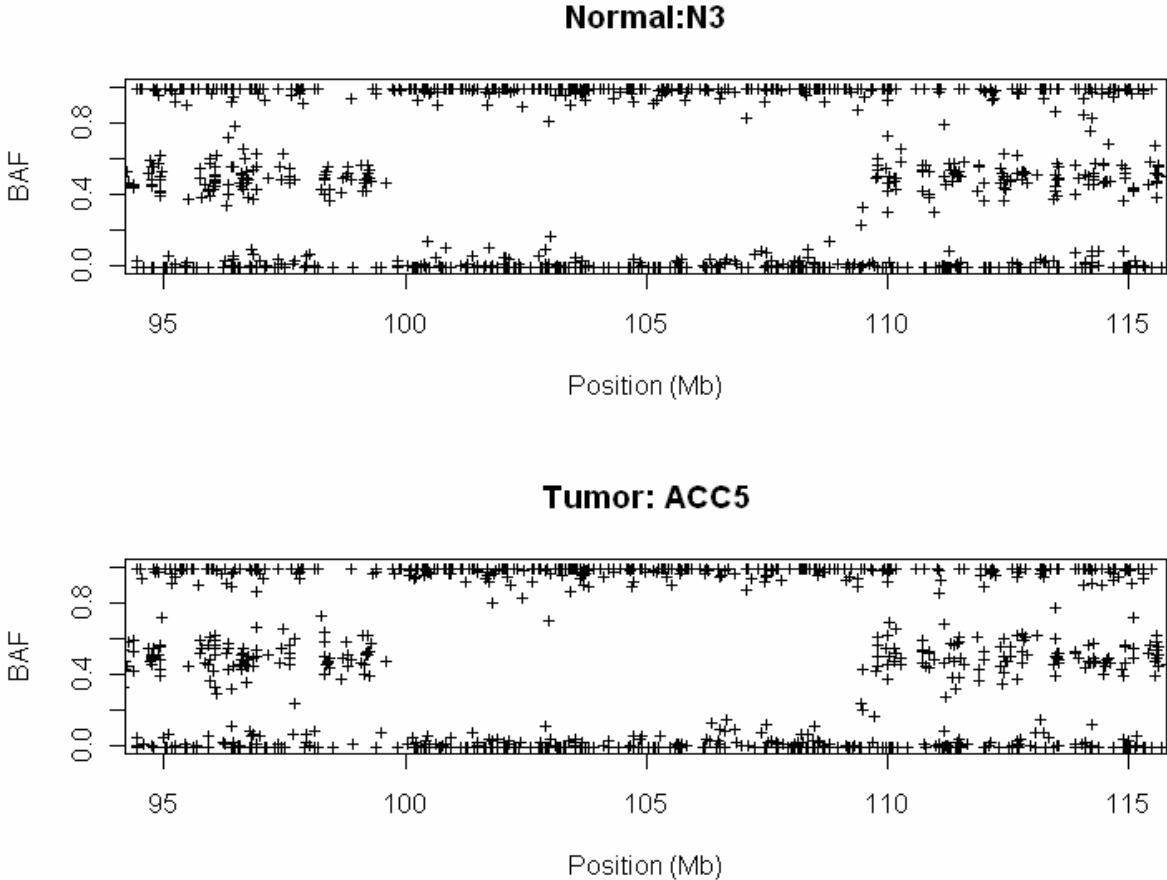

Supplement: mmc2.pdf [file mmc2.pdf]

### Supplemental Figure 3.

### Chromosome 6

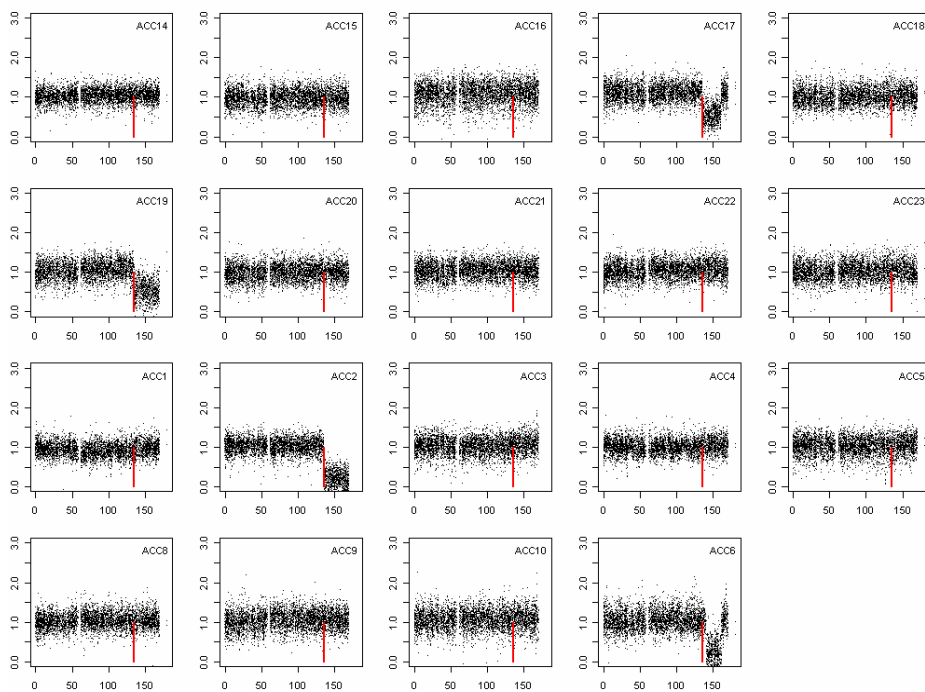

### Chromosome 9

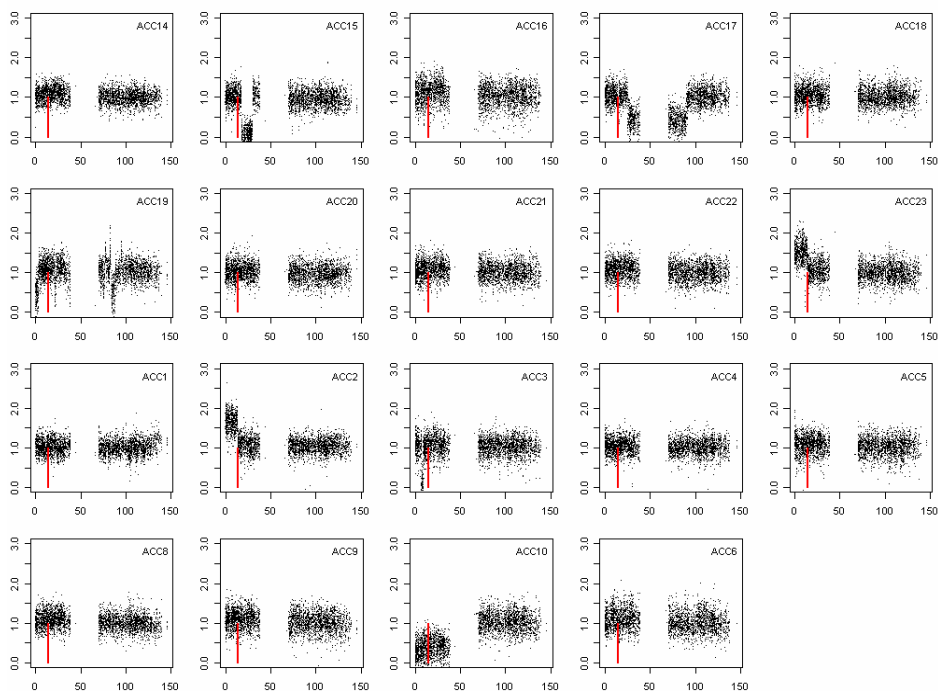

Supplement: mmc3.pdf [file mmc3.pdf]

Supplemental Figure 4.

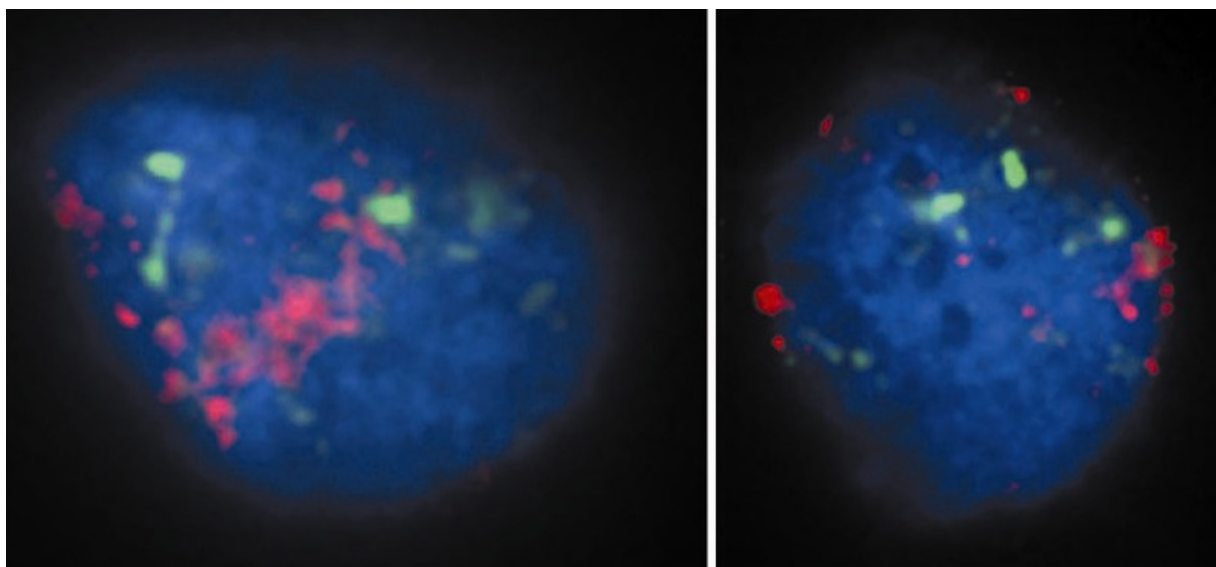

Supplement: mmc4.pdf [file mmc4.pdf]

Supplemental Figure 5.

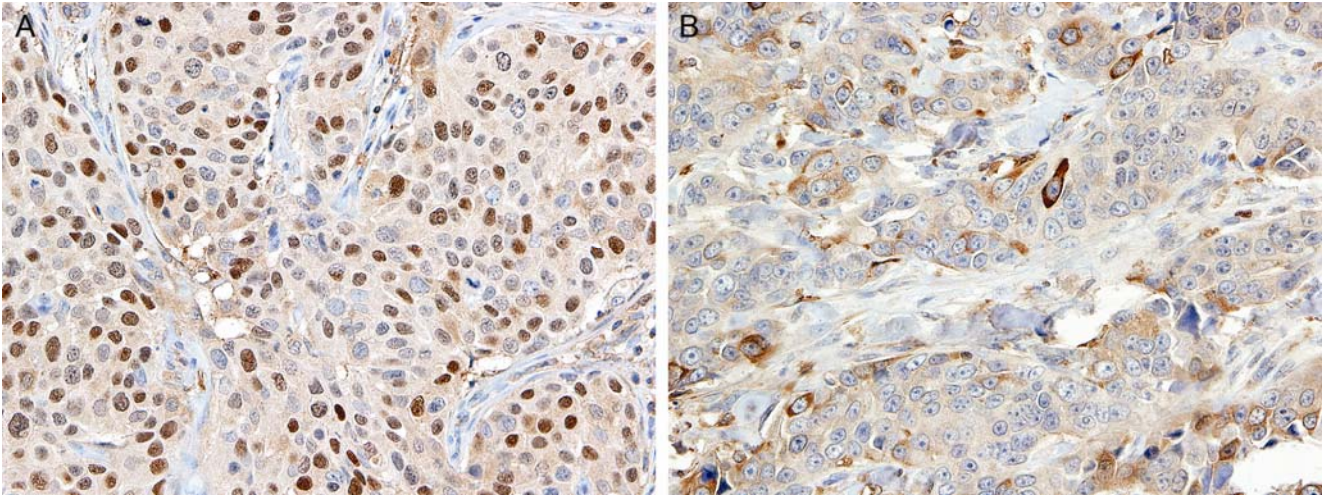

Supplement: mmc5.pdf [file mmc5.pdf]
